# Supplementary material for: Transcription factor paralogs orchestrate alternative gene regulatory networks by context-dependent cooperation with multiple cofactors
Source: PubMed Central journal article supplement (PMC9249852; doi:10.1038/s41467-022-31501-2), 2022-07-01
Supplement: 41467_2022_31501_MOESM1_ESM.pdf [file 41467_2022_31501_MOESM1_ESM.pdf]

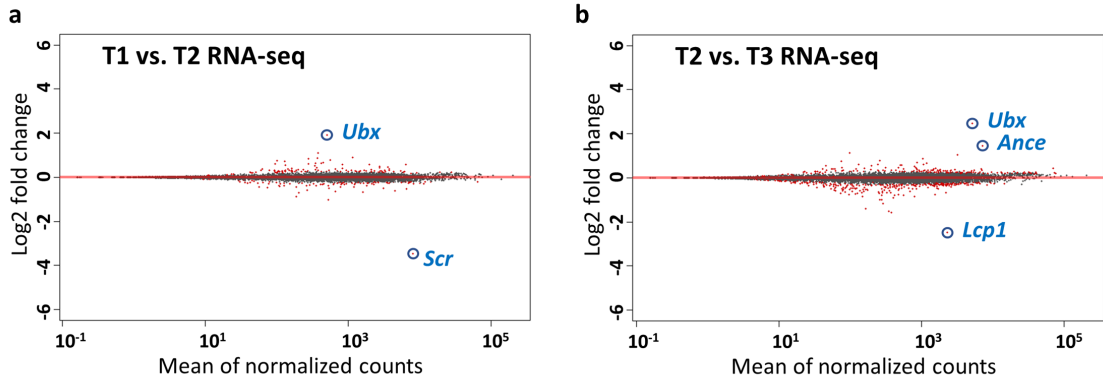

- c
- $FDR < 0.01$  AND  $abs(\log_2(\text{fold change})) > 1$

|      |    | up |    |    |
|------|----|----|----|----|
|      |    | T1 | T2 | T3 |
| down | T1 |    | 2  | 8  |
|      | T2 | 2  |    | 4  |
|      | T3 | 20 | 6  |    |

Supplementary Fig. 1

**Supplementary Fig. 1. The transcriptomes of the 3 pairs of leg discs are highly similar**

- a.** MA plot comparing the transcriptomes of T1 and T2 leg discs. Differentially expressed genes, which are defined as  $FDR < 0.01$ , are labeled red.
- b.** Similar to **a**, except that the comparison is between T2 and T3 leg discs.
- c.** Table showing the number of differentially expressed genes with at least a 2-fold change for all pair-wise comparisons.

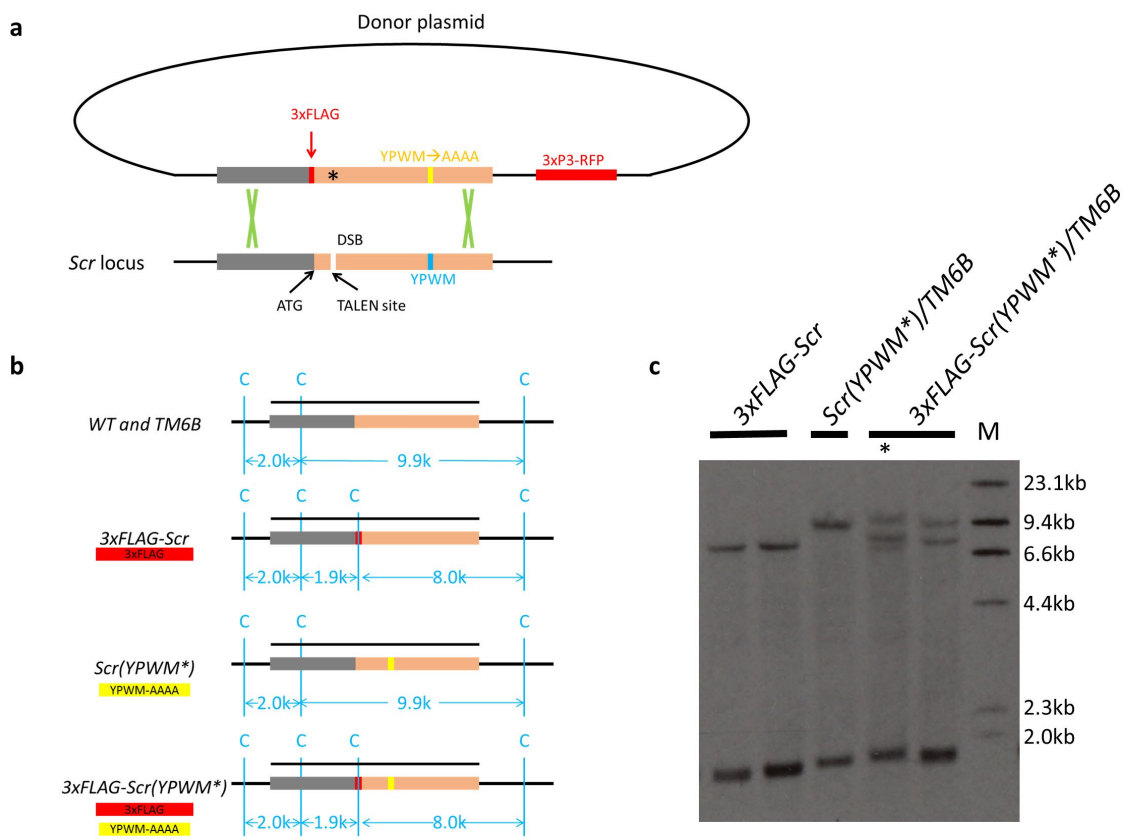

Supplementary Fig. 2

**Supplementary Fig. 2. The generation of 3xFLAG-Scr and 3xFLAG-Scr(YPWM\*) alleles.**

**a.** The strategy used in targeting the *Scr* locus using a pair of TALENs. The orange boxes indicate coding region, and the grey boxes are the 5'UTR. The positions of the ATG start codon, 3xFLAG tag, TALEN target site, the YPWM motif, and the mutated YPWM motif on the donor plasmid are shown. The asterisk indicates that the TALEN target on the donor plasmid is mutated, so the TALENs only cut the genomic DNA. 3xP3-RFP was included on the donor plasmid to select against whole plasmid integration events (see [Methods](#)). DSB: double stranded DNA break.

**b.** Clal restriction map of various genotypes. The blue lines indicate the Clal sites relevant to the Southern blot. The positions of the 3xFLAG tag and the YPWM-AAAA mutation are indicated when applicable. The black bars above the genomic loci indicate the fragment used as Southern probe, and the sizes of expected Southern bands are shown.

**c.** Southern blot result of several alleles obtained in genomic targeting of the *Scr* locus. M: Roche DIG labeled DNA marker II. Asterisk: a potentially erroneous allele with a Southern blot pattern deviated from the expected one.

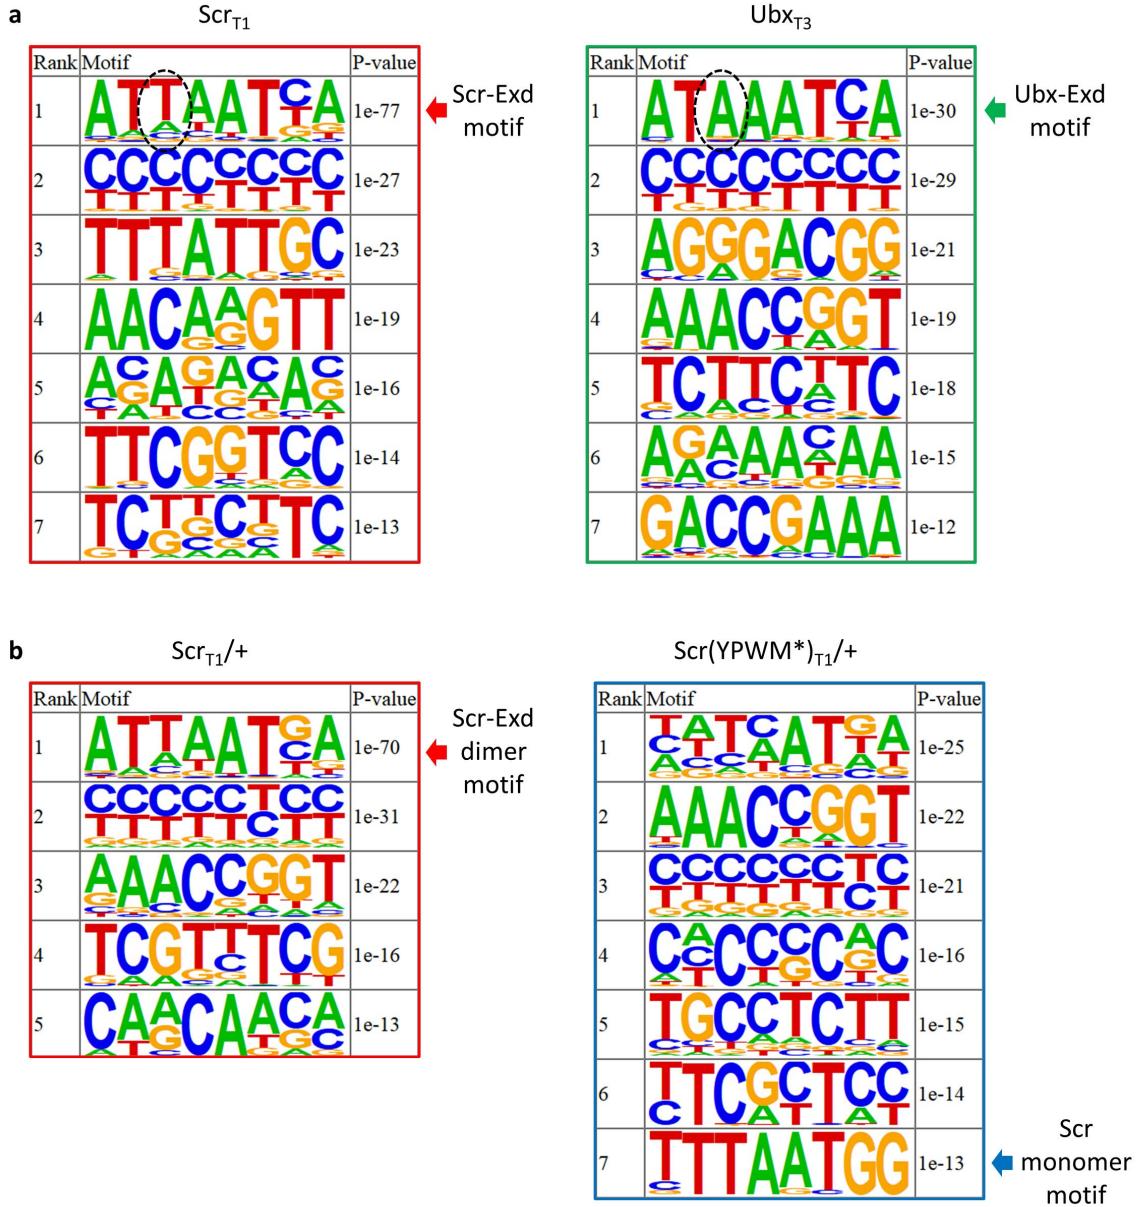

Supplementary Fig. 3

**Supplementary Fig. 3. Sequences identified by *de novo* motif searches.**

**a.** Motifs enriched in  $Scr_{T1}$  and  $Ubx_{T3}$  peaks that are located in intergenic or intronic regions of the genome. Arrows point out known Scr-Exd and Ubx-Exd dimer motifs. Dashed ovals highlight the positions within the Hox-Exd heterodimer motifs that Scr and Ubx are known to have different preferences<sup>3</sup>. Up to 7 significantly enriched motifs are shown.

**b.** Motifs enriched in  $Scr_{T1/+}$  and  $Scr(YPWM^*)_{T1/+}$  peaks located in intergenic and intronic regions. Red arrow indicates the known Scr-Exd dimer motif, and blue arrow indicates a potential Scr monomer motif. Up to 7 significantly enriched motifs are shown.

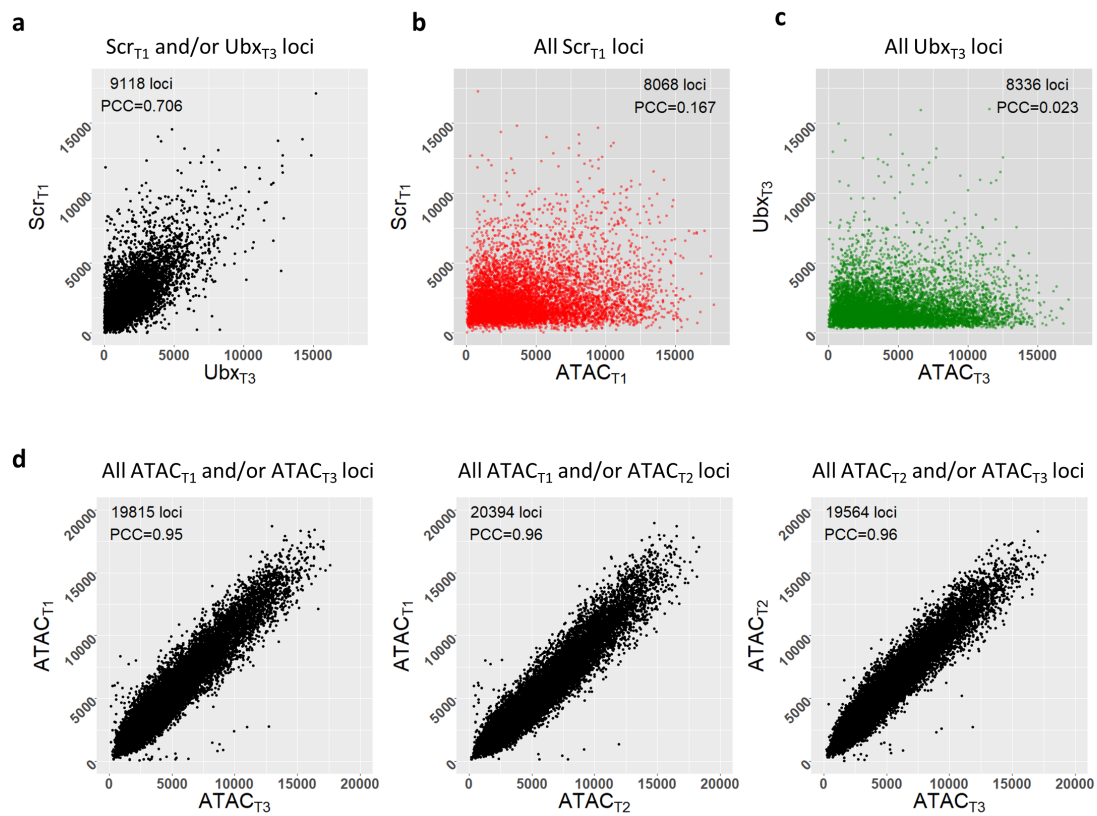

Supplementary Fig. 4

**Supplementary Fig. 4. Most paralog-specific Hox bound loci do not show tissue-specific differences in chromatin accessibility.**

**a.** Scatter plot comparing  $Scr_{T1}$  and  $Ubx_{T3}$  ChIP-seq signals in all Hox bound loci. Hox bound loci are defined as loci bound by either Scr in T1 leg discs or by Ubx in T3 leg discs, or by both (see **Methods**). The Pearson's correlation coefficient (PCC) between  $Scr_{T1}$  and  $Ubx_{T3}$  signals in all Hox bound loci is reported.

**b and c.** Correlation between  $Scr_{T1}$  ChIP-seq and  $ATAC_{T1}$  signals in all loci bound by Scr in the T1 leg discs (**b**), as well as that between  $Ubx_{T3}$  ChIP-seq and  $ATAC_{T3}$  signals in all loci bound by Ubx in the T3 leg discs (**c**). The Pearson's correlation coefficient (PCC) is reported.

**d.** Pair-wise comparisons of ATAC-seq signals between different leg discs. The number of loci and the Pearson's correlation coefficient (PCC) are reported.



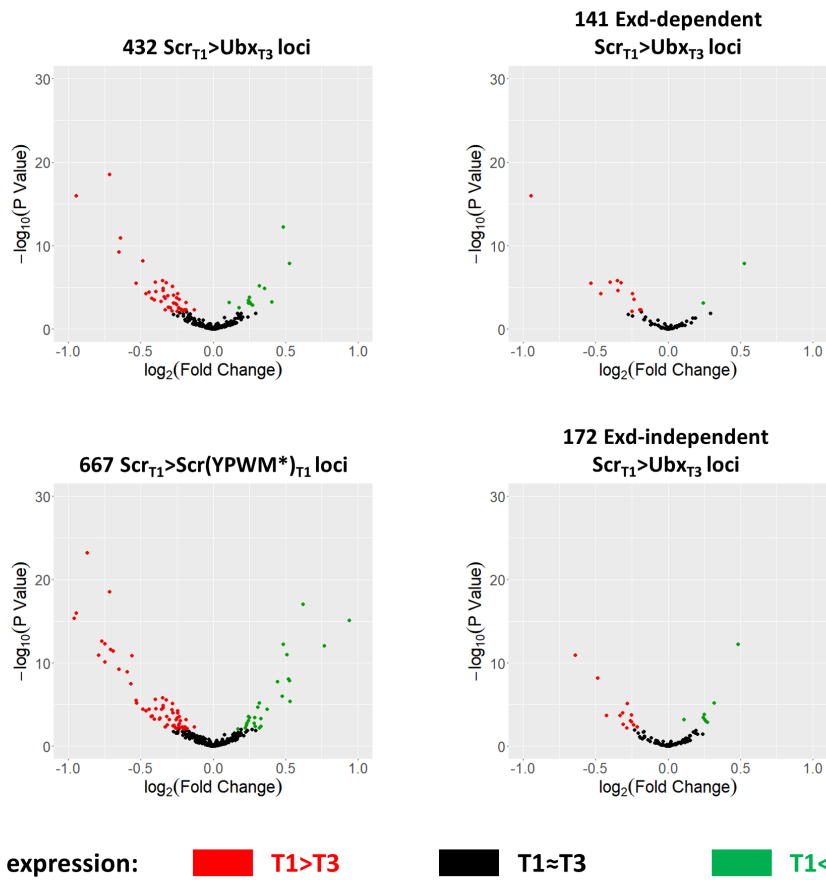

Supplementary Fig. 5

**Supplementary Fig. 5. Correlation between Hox-DNA binding and nearby gene transcription.**

Volcano plots showing T1 and T3 leg disc RNA expression of genes near different classes of Hox CHIP peaks. Genes with T1>T3 expression have negative log fold change, and those with an FDR<0.05 are colored red. Genes with T1<T3 expression have positive log fold change, and those with an FDR<0.05 are colored green.

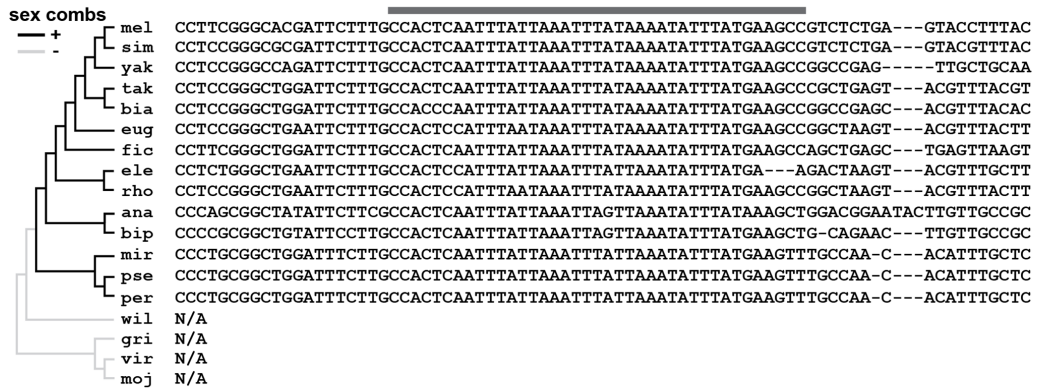

Supplementary Fig. 6

**Supplementary Fig. 6. The conservation of *dsx-1* CRM sequence correlates with the presence of sex combs.**

DNA sequence near the center of Hox CHIP peak 2 of the *dsx-1* CRM is aligned across selected *Drosophila* species. The grey bar highlights the region matches the region denoted by the vertical grey bar in Fig. 8B, and is the region of the CRM that when deleted, alters the *dsx-1* reporter gene expression. This region is highly AT-rich and contains many potential homeodomain binding sites, several of which fit the Scr-Dll consensus binding site. The presence or absence of sex comb teeth on male T1 legs is shown, and is based on <sup>5,6</sup>.

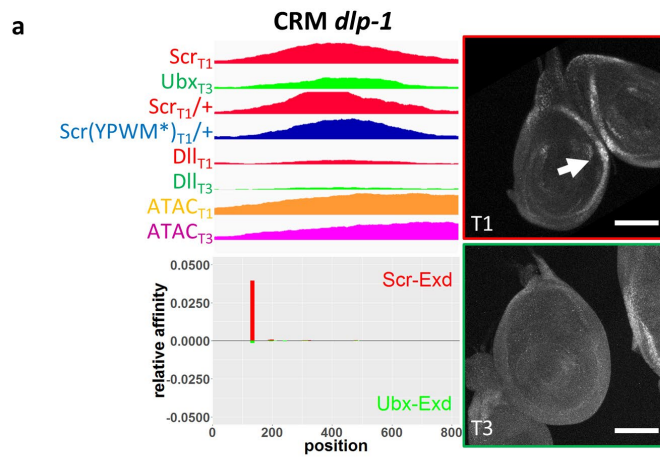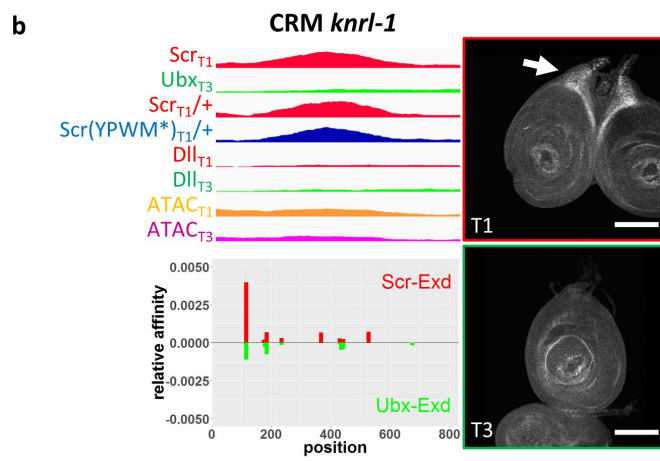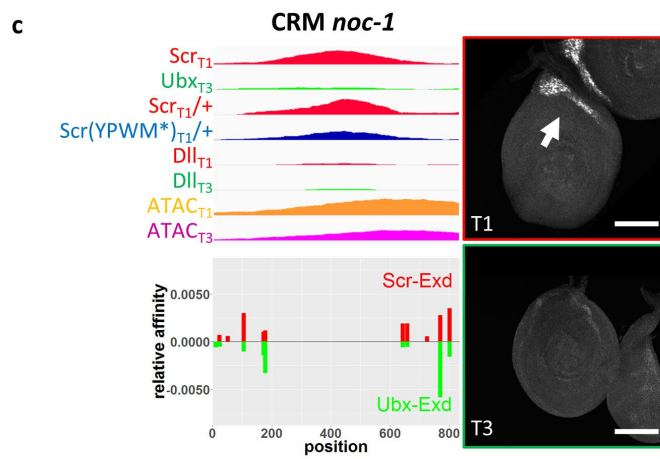

Supplementary Fig. 7

**Supplementary Fig. 7. Examples of Exd-independent  $Scr_{T1}>Ubx_{T3}$  CRMs without Dll co-occupancy that drive T1>T3 expression**

**a.** CRM *dip-1*. **b.** CRM *knrl-1*. **c.** CRM *noc-1*. Antibody staining results of T1 and T3 leg discs are shown, and the T1 specific expression patterns are indicated by arrows. The genome browser tracks for the  $Scr_{T1}$ ,  $Ubx_{T3}$ ,  $Scr_{T1/+}$ ,  $Scr(YPWM^*)_{T1/+}$ ,  $Dll_{T1}$  and  $Dll_{T3}$  ChIP-seq signals, as well as  $ATAC_{T1}$  and  $ATAC_{T3}$  signals are shown for the genomic fragment used to generate the reporters (top left). The *NRLB* relative affinity tracks for Scr-Exd and Ubx-Exd heterodimers, aligned with the genome browser tracks, are shown at the bottom left. Note the absence of significant Hox-Exd binding motifs near Scr ChIP-seq peak center. Scale bar: 100  $\mu$ m.

The second *Scr* exon (the first coding exon plus part of 5' UTR)

ACTCCAATCCACGACAACGACCCCTGGCTTTAAA**ATG**GATCCCGACTGTTTTGCGA  
TGTCCTCGTACCAGTTC**GTCAACTCGCTGGCCTCCTGTTATCCGCAGCAGATGAA**  
**TCCGCAGCAGAATCACCCGGGAGCGGGAAAT**TTCGAGTGCAGGCGGCAGCGGTG  
GAGGGGCGGGCGGTAGCGGGGGCGTGGTGCCAGCGGCGGAACGAACGGCGG  
TCAGGGCAGTGCGGGGGCGGCCACTCCGGGGGCGAACGACTACTTCCCAGCCG  
CGGCGGCCTATACGCCTAACCTGTATCCAAACACACCGCAGGCCACTACGCCAA  
TCAGGCGGCCTACGGCGGACAGGGAAATCCGGATATGGTGGACTACACGCAGCT  
ACAGCCGCAGCGACTGCTCCTGCAGCAGCAGCAGCAACAGCAACAGCAGCAACA  
TGCCCATGCAGCGGCAGCAGTTGCTGCCAGCAGCAGCAGCAACTCGCCAGCA  
GCAACACCCGCAACAGCAGCAACAGCAGCAGCAGGCGAACATCAGTTGCAAGTAC  
GCCAACGATCCAGTGACGCCGGGCGGAAGTGGGGGCGGGGGTGTTCGGGTAG  
CAACAACAATAACAATAGCGCCAACAGCAACAACAACAACAGCCAGTCGCTAGCCA  
GTCCACAGGATCTGTCCACCAGGGACATATCGCCCAAACCTGTGCCAGCTCAGT  
GGTAGAGAGTGTGGCCCGATCGCTGAACAAGGGCGTCCTGGGCGGAAGCTTGGC  
GGCCGCCGCTGCCGCCGCCGGCTTGAACAACAACCACAGCGGATCGGGAGTGTC  
CGGAGGACCTGGAACGTCAATGTTCCCATGCACAGTCCGGGGGGCGGGGATTC  
GGACTCCGAGAGCGATAGCGGCAATGAGGCGGGCAGTAGCCAGAACAGCGGCAA  
TGGAAGAAGAACCCGCCGCAGATAT**TATCCGTGGATGAAGCGAGTACATCTCGGG**  
ACGA

**ATG start codon of *Scr***

**YPWM motif encoding sequence**

***Scr*-TALEN-L and *Scr*-TALEN-R target sites**

**TALEN target spacer**

**47 bp deleted in the *Scr*<sup>C8-1</sup> allele**

Scr-DDD TALEN Sequence (pCS2TAL3-Scr-DDD)

**Primer Sequences**

**ATG-Start Codon**

**Flag Tag**

**RVD Sequence**

**Unique Restriction Enzyme Sites**

**FokI Domain-DDD**

SV40 UTR

CGCATTCTGCCTGGGGACGTCCGGAGCAAGCTTGATTTAGGTGACACTATAGAAT  
ACAAGCTACTTGTTCTTTTTGCAGGATCTGCCACC**ATG**GCTCCAAAGAAGAAGCGT  
AAGGTAGACTACAAAGACCATGACGGTGATTATAAAGATCATGACATC**GATTACAA**  
**GGATGACGATGACAAG**GGTACCGTGGATCTACGCACGCTCGGCTACAGTCAGCAG  
CAGCAAGAGAAGATCAAACCGAAGGTGCGTTCGACAGTGGCGCAGCACCACGAG  
GCACTGGTGGGCCATGGGTTTACACACGCGCACATCGTTGCGCTCAGCCAACACC  
CGGCAGCGTTAGGGACCGTTCGCTGTCACGTATCAGCACATAATCACGGCGTTGCC  
AGAGGCGACACACGAAGACATCG**TTGGCGTTCGGCAAACAGTGG**TCCGGCGCACG

CGCCCTGGAGGCCTTGCTCACGGATGCGGGGGAGTTGAGAGGTCCGCCGTTACA  
GTTGGACACAGGCCAACTTGTGAAGATTGCAAACGTGGCGGCGTGACCGCAATG  
GAGGCAGTGCATGCATCGCGCAATGCACTGACGGGTGCCCCCT  
GAACCTGACCCCGGACCAAGTGGTGGCTATCGCCAGCCACGATGGCGGCAAGCA  
AGCGCTCGAAACGGTGCAGCGGCTGTTGCCGGTGCTGTGCCAGGACCATGGCCT  
GACCCCGGACCAAGTGGTGGCTATCGCCAGCAACAATGGCGGCAAGCAAGCGCT  
CGAAACGGTGCAGCGGCTGTTGCCGGTGCTGTGCCAGGACCATGGCCTGACCCC  
GGACCAAGTGGTGGCTATCGCCAGCAACGGTGGCGGCAAGCAAGCGCTCGAAAC  
GGTGCAGCGGCTGTTGCCGGTGCTGTGCCAGGACCATGGCCTGACTCCGGACCA  
AGTGGTGGCTATCGCCAGCCACGATGGCGGCAAGCAAGCGCTCGAAACGGTGCA  
GCGGCTGTTGCCGGTGCTGTGCCAGGACCATGGCCTGACCCCGGACCAAGTGGT  
GGCTATCGCCAGCAACATTGGCGGCAAGCAAGCGCTCGAAACGGTGCAGCGGCT  
GTTGCCGGTGCTGTGCCAGGACCATGGCCTGACCCCGGACCAAGTGGTGGCTAT  
CGCCAGCAACATTGGTGGAAAACAGGCCCTTGAAACGGTGCAGCGGCTGTTGCC  
GGTGTGTGCCAGGACCATGGCCTGACTCCGGACCAAGTGGTGGCTATCGCCAG  
CCACGATGGCGGCAAGCAAGCGCTCGAAACGGTGCAGCGGCTGTTGCCGGTGCT  
GTGCCAGGACCATGGCCTGACCCCGGACCAAGTGGTGGCTATCGCCAGCAACGG  
TGGCGGCAAGCAAGCGCTCGAAACGGTGCAGCGGCTGTTGCCGGTGCTGTGCCA  
GGACCATGGCCTGACTCCGGACCAAGTGGTGGCTATCGCCAGCCACGATGGCGG  
CAAGCAAGCGCTCGAAACGGTGCAGCGGCTGTTGCCGGTGCTGTGCCAGGACCA  
TGGCCTGACCCCGGACCAAGTGGTGGCTATCGCCAGCAACAATGGCGGCAAGCA  
AGCGCTCGAAACGGTGCAGCGGCTGTTGCCGGTGCTGTGCCAGGACCATGGCCT  
GACCCCGGACCAAGTGGTGGCTATCGCCAGCCACGATGGCGGCAAGCAAGCGCT  
CGAAACGGTGCAGCGGCTGTTGCCGGTGCTGTGCCAGGACCATGGCCTGACCCC  
GGACCAAGTGGTGGCTATCGCCAGCAACGGTGGCGGCAAGCAAGCGCTCGAAAC  
GGTGCAGCGGCTGTTGCCGGTGCTGTGCCAGGACCATGGCCTGACCCCGGACCA  
AGTGGTGGCTATCGCCAGCAACAATGGCGGCAAGCAAGCGCTCGAAACGGTGCA  
GCGGCTGTTGCCGGTGCTGTGCCAGGACCATGGCCTGACCCCGGACCAAGTGGT  
GGCTATCGCCAGCAACAATGGCGGCAAGCAAGCGCTCGAAACGGTGCAGCGGCT  
GTTGCCGGTGCTGTGCCAGGACCATGGCCTGACTCCGGACCAAGTGGTGGCTATC  
GCCAGCCACGATGGCGGCAAGCAAGCGCTCGAAACGGTGCAGCGGCTGTTGCCG  
GTGCTGTGCCAGGACCATGGCCTGACTCCGGACCAAGTGGTGGCTATCGCCAGC  
CACGATGGCGGCAAGCAAGCGCTCGAAACGGTGCAGCGGCTGTTGCCGGTGCTG  
TGCCAGGACCATGGCCTGACCCCGGACCAAGTGGTGGCTATCGCCAGCAACGGT  
GGCGGCAAGCAAGCGCTCGAAAGCATTGTGGCCAGCTGAGCCGGCCTGATCCG  
GCGTTGGCCGCGTTGAC

CAACGACCACCTCGTCGCCTTGGCCTGCCTCGGCGGACGTCCTGCCATGGATGCA  
GTGAAAAGGGATTGCCGCACGCGCCGGAATTGATCAGAAGAGTCAATCGCCGTA  
TTGGCGAACGCACGTCCATCGCGTTGCCGGATCCCAACTAGTCAAAGTGA  
GGAGGAGAAGAAATCTGAACTTCGTCATAAATTGAAATATGTGCCTCATGAATATA  
TGAATTAATTGAAATTGCCAGAAATCCACTCAGGATAGAATTCTTGAATGAAGGT  
AATGGAATTTTTATGAAAGTTTATGGATATAGAGGTAACATTTGGGTGGATCAAG  
GAAACCGGACGGAGCAATTTATACTGTCGGATCTCCTATTGATTACGGTGTGATCG  
TGGATACTAAAGCTTATAGCGGAGGTTATAATCTGCCAATTGGCCAAGCAGATGAA  
ATGCAAGACTATGTGGAAGAAAATCAAACACGAGACAAACATATCAACCCTAATGA  
ATGGTGGAAAGTCTATCCATCTTCTGTAACGGAATTAAGTTTTATTGTGAGTGG



TCACITTAAGGAACTACAAAGCTCAGCTTACACGATTAATCATATCACTAATTG  
TAATGGAGCTGTTCTTAGTGTAGAAGAGCTTTAATTGGTGGAGAAATGATTAAGC  
CGGCACATTAACCTTAGAGGAAGTGCGCCGAAATTTAATAACGGCGAGATAAACT  
TTAACTCTAGA ACTATAGTGAGTCGTATTACGTAGATCCAGACATGATAAGATACAT  
TGATGAGTTTGGACAAACCACAACCTAGAATGCAGTGAAAAAATGCTTTATTTGTGA  
AATTTGTGATGCTATTGCTTTATTTGTAACCATTATAAGCTGCAATAAACAAGTTAAC  
AACAACAATTGCATTCATTTTATGTTTCAGGTTCCAGGGGGAGGTGTGGGAGGTTTT  
TTAATTCGCGGCCGCGGCGCCAATGCATTGGGCCCGGTACGTACCAGCTTTTGT  
TCCCTTTAGTGAGGGTTAATTGCGCGCTTGGCGTAATCATGGTCATAGCTGTTTCC  
TGTGTGAAATTGTTATCCGCTCACAATCCACACAACATACGAGCCGGAAGCATAA  
AGTGTAAGCCTGGGGTGCCTAATGAGTGAGCTAACTCACATTAATTGCGTTGCGC  
TCACTGCCCGCTTTCCAGTCGGGAAACCTGTGCGTCCAGCTGCATTAATGAATCG  
GCCAACGCGCGGGGAGAGGCGGTTTGCCTATTGGGCGCTCTTCCGCTTCCCTCGC  
TCACTGACTCGCTGCGCTCGGTGCTTCCGCTGCGGCGAGCGGTATCAGCTCACTC  
AAAGGCGGTAATACGGTTATCCACAGAATCAGGGGATAACGCAGGAAAGAACATG  
TGAGCAAAGGCCAGCAAAGGCCAGGAACCGTAAAAAGGCCGCGTTGCTGGCG  
TTTTTCCATAGGCTCCGCCCCCTGACGAGCATCACAAAAATCGACGCTCAAGTCA  
GAGGTGGCGAAACCCGACAGGACTATAAAGATACCAGGCGTTTCCCCCTGGAAGC  
TCCCTCGTGCGCTCTCCTGTTCCGACCCTGCCGCTTACCGGATACCTGTCCGCCT  
TTCTCCCTTCGGGAAGCGTGGCGCTTCTCATAGCTCACGCTGTAGGTATCTCAGT  
TCGGTGTAGGTCGTTGCTCCAAGCTGGGCTGTGTGCACGAACCCCCCGTTCAGC  
CCGACCGCTGCGCCTTATCCGGTAACCTATCGTCTTGAGTCCAACCCGGTAAGACA  
CGACTTATCGCCACTGGCAGCAGCCACTGGTAACAGGATTAGCAGAGCGAGGTAT  
GTAGGCGGTGCTACAGAGTTCTTGAAGTGGTGGCCTAACTACGGCTACACTAGAA  
GGACAGTATTTGGTATCTGCGCTCTGCTGAAGCCAGTTACCTTCGGAAAAAGAGTT  
GGTAGCTCTTGATCCGGCAAACAAACCACCGCTGGTAGCGGTGGTTTTTTTTGTTG  
CAAGCAGCAGATTACGCGCAGAAAAAAGGATCTCAAGAAGATCCTTTGATCTTTT  
CTACGGGGTCTGACGCTCAGTGGAACGAAACTCACGTTAAGGGATTTTGGTCAT  
GAGATTATCAAAAAGGATCTTACCTAGATCCTTTTAAATTAATAAATGAAGTTTTAA  
TCAATCTAAAGTATATATGAGTAACTTGGTCTGACAGTTACCAATGCTTAATCAGT  
GAGGCACCTATCTCAGCGATCTGTCTATTTGTTTCATCCATAGTTGCCTGACTCCC  
CGTCGTGTAGATAACTACGATACGGGAGGGCTTACCATCTGGCCCCAGTGCTGCA  
ATGATACCGCGAGACCCACGCTCACCGGCTCCAGATTTATCAGCAATAAACCAGC  
CAGCCGGAAGGGCCGAGCGCAGAAGTGGTCCTGCAACTTTATCCGCCTCCATCCA  
GTCTATTAATTGTTGCCGGGAAGCTAGAGTAAGTAGTTCGCCAGTTAATAGTTTGC  
GCAACGTTGTTGCCATTGCTACAGGCATCGTGGTGTACGCTCGTCTGTTTGGTATG  
GCTTCATTCAGCTCCGGTTCCCAACGATCAAGGCGAGTTACATGATCCCCCATGTT  
GTGCAAAAAGCGGTTAGCTCCTTCGGTCCCTCCGATCGTTGTCAGAAGTAAGTTGG  
CCGCAGTGTTATCACTCATGTTATGGCAGCACTGCATAATTCTCTTACTGTCATGC  
CATCCGTAAGATGCTTTTCTGTGACTGGTGAAGTACTCAACCAAGTCATTCTGAGAAT  
AGTGTATGCGGCGACCGAGTTGCTCTTGCCCGGCGTCAATACGGGATAATACCGC  
GCCACATAGCAGAACTTTAAAAGTGCTCATCATTGGAAAACGTTCTTCGGGGCGAA  
AACTCTCAAGGATCTTACCGCTGTTGAGATCCAGTTCGATGTAACCCACTCGTGCA  
CCCAACTGATCTTCAGCATCTTTTACTTTACCAGCGTTTCTGGGTGAGCAAAAACA  
GGAAGGCAAAATGCCGCAAAAAGGGAATAAGGGCGACACGGAAATGTTGAATAC  
TCATACTCTTCTTTTTCAATATTATTGAAGCATTATCAGGGTTATTGTCTCATGAG

CGGATACATATTTGAATGTATTTAGAAAAATAAACAAATAGGGGTTCCGCGCACATT  
TCCCCGAAAAGTGCCACCTAAATTGTAAGCGTTAATATTTTGTAAATTCGCGTTA  
AATTTTTGTAAATCAGCTCATTTTTTAACCAATAGGCCGAAATCGGCAAATCCCT  
TATAAATCAAAGAATAGACCGAGATAGGGTTGAGTGTTGTTCCAGTTTGGAACAA  
GAGTCCACTATTAAGAACGTGGACTCCAACGTCAAAGGGCGAAAAACCGTCTATC  
AGGGCGATGGCCCACTACGTGAACCATCACCTAATCAAGTTTTTTGGGGTTCGAG  
GTGCCGTAAAGCACTAAATCGGAACCCTAAAGGGAGCCCCGATTTAGAGCTTGA  
CGGGGAAAGCCGGCGAACGTGGCGAGAAAGGAAGGGAAGAAAGCGAAAGGAGC  
GGGCGCTAGGGCGCTGGCAAGTGTAGCGGTCACGCTGCGCGTAACCACCACACC  
CGCCGCGCTTAATGCGCCGCTACAGGGCGCGTCCCATTCCGCCATTCAGGCTGCG  
CAACTGTTGGGAAGGGCGATCGGTGCGGGCCTCTTCGCTATTACGCCAGTCGACC  
ATAGCCAATTC AATATGGCGTATATGGACTCATGCCAATTC AATATGGTGGATCTG  
GACCTGTGCCAATTC AATATGGCGTATATGGACTCGTGCCAATTC AATATGGTGG A  
TCTGGACCCCAGCCAATTC AATATGGCGGACTTGGCACCATGCCAATTC AATATGG  
CGGACTTGGCACTGTGCCAACTGGGGAGGGGTCTACTTGGCACGGTGCCAAGTTT  
GAGGAGGGGTCTTGGCCCTGTGCCAAGTCCGCCATATTGAATTGGCATGGTGCCA  
ATAATGGCGGCCATATTGGCTATATGCCAGGATCAATATATAGGCAATATCCAATAT  
GGCCCTATGCCAATATGGCTATTGGCCAGGTTCAATACTATGTATTGGCCCTATGC  
CATATAGTATTCCATATATGGGTTTTCTATTGACGTAGATAGCCCCTCCCAATGGG  
CGGTCCCATATACCATATATGGGGCTTCTAATACCGCCCATAGCCACTCCCCCAT  
TGACGTCAATGGTCTCTATATATGGTCTTCTATTGACGTCAATGGGCGGTCTTA  
TTGACGTATATGGCGCCTCCCCCATTGACGTCAATTACGGTAAATGGCCCCGCTG  
GCTCAATGCCCATTGACGTCAATAGGACCACCCACCATTGACGTCAATGGGATGG  
CTCATTGCCCATTCAATATCCGTTCTCACGCCCCCTATTGACGTCAATGACGGTAAAT  
GGCCCACTTGGCAGTACATCAATATCTATTAATAGTAACTTGGCAAGTACACTACTA  
TTGGAAGGACGCCAGGGTACATTGGCAGTACTCCCATTGACGTCAATGGCGGTAA  
ATGGCCC GCGATGGCTGCCAAGTACATCCCCATTGACGTCAATGGGGAGGGGCA  
ATGACGCAAATGGGCGTTCCATTGACGTAAATGGGCGGTAGGCGTGCCTAATGGG  
AGGTCTATATAAGCAATGCTCGTTTAGGGAAC

Scr-RRR TALEN Sequence (pCS2TAL3-Scr-RRR)

Primer Sequences

ATG-Start Codon

HA TAG

RVD Sequence

Unique Restriction Enzyme Sites

FokI Domain-RRR

SV40 UTR

CGCCATTCTGCCTGGGGACGTCCGAGCAAGCTTGATTTAGGTGACACTATAGAAT  
ACAAGCTACTTGTTCCTTTTTGCAGGATCTGCCACCATGGCTCCAAAGAAGAAGCGT  
AAGGTA **TACCCATACGATGTTCTCCTGACTATGCG**GGCTATCCCTATGACGTCCCGGA  
CTATGCAGGATCG **TATCCATATGACGTTCCAGATTACGCT**GCTCATGGTACCGTGG  
ATCTACGCACGCTCGGCTACAGTCAGCAGCAGCAAGAGAAGATCAAACCGAAGGT  
GCGTTCGACAGTGGCGCAGCACCACGAGGCACTGGTGGGCCATGGGTTTACACA  
CGCGCACATCGTTGCGCTCAGCCAACACCCGGCAGCGTTAGGGACCGTCGCTGT

CACGTATCAGCACATAATCACGGCGTTGCCAGAGGCGACACACGAAGACATCGTT  
GGCGTCGGCAAACAGTGGTCCGGCGCACGCGCCCTGGAGGCCTTGCTCACGGAT  
GCGGGGGAGTTGAGAGGTCCGCCGTTACAGTTGGACACAGGCCAACTTGTGAAG  
ATTGCAAACGTGGCGGCGTGACCGCAATGGAGGCAGTGCATGCATCGCGCAAT  
GCACTGACGGGTGCCCCCT  
GAACCTGACCCCGGACCAAGTGGTGGCTATCGCCAGCCACGATGGCGGCAAGCA  
AGCGCTCGAAACGGTGCAGCGGCTGTTGCCGGTGTGTGCCAGGACCATGGCCT  
GACCCCGGACCAAGTGGTGGCTATCGCCAGCAACGGTGGCGGCAAGCAAGCGCT  
CGAAACGGTGCAGCGGCTGTTGCCGGTGTGTGCCAGGACCATGGCCTGACCCC  
GGACCAAGTGGTGGCTATCGCCAGCAACAATGGCGGCAAGCAAGCGCTCGAAAC  
GGTGCAGCGGCTGTTGCCGGTGTGTGCCAGGACCATGGCCTGACTCCGGACCA  
AGTGGTGGCTATCGCCAGCCACGATGGCGGCAAGCAAGCGCTCGAAACGGTGC  
GCGGCTGTTGCCGGTGTGTGCCAGGACCATGGCCTGACCCCGGACCAAGTGGT  
GGCTATCGCCAGCAACGGTGGCGGCAAGCAAGCGCTCGAAACGGTGCAGCGGCT  
GTTGCCGGTGTGTGCCAGGACCATGGCCTGACCCCGGACCAAGTGGTGGCTAT  
CGCCAGCAACAATGGTGGAAACAGGCCCTTGAAACGGTGCAGCGGCTGTTGCC  
GGTGTGTGCCAGGACCATGGCCTGACTCCGGACCAAGTGGTGGCTATCGCCAG  
CCACGATGGCGGCAAGCAAGCGCTCGAAACGGTGCAGCGGCTGTTGCCGGTGT  
GTGCCAGGACCATGGCCTGACCCCGGACCAAGTGGTGGCTATCGCCAGCAACA  
TGCGGCAAGCAAGCGCTCGAAACGGTGCAGCGGCTGTTGCCGGTGTGTGCCA  
GGACCATGGCCTGACCCCGGACCAAGTGGTGGCTATCGCCAGCAACAATGGCGG  
CAAGCAAGCGCTCGAAACGGTGCAGCGGCTGTTGCCGGTGTGTGCCAGGACCA  
TGGCCTGACCCCGGACCAAGTGGTGGCTATCGCCAGCAACATTGGCGGCAAGCA  
AGCGCTCGAAACGGTGCAGCGGCTGTTGCCGGTGTGTGCCAGGACCATGGCCT  
GACCCCGGACCAAGTGGTGGCTATCGCCAGCAACGGTGGCGGCAAGCAAGCGCT  
CGAAACGGTGCAGCGGCTGTTGCCGGTGTGTGCCAGGACCATGGCCTGACCCC  
GGACCAAGTGGTGGCTATCGCCAGCAACGGTGGCGGCAAGCAAGCGCTCGAAAC  
GGTGCAGCGGCTGTTGCCGGTGTGTGCCAGGACCATGGCCTGACTCCGGACCA  
AGTGGTGGCTATCGCCAGCCACGATGGCGGCAAGCAAGCGCTCGAAACGGTGC  
GCGGCTGTTGCCGGTGTGTGCCAGGACCATGGCCTGACCCCGGACCAAGTGGT  
GGCTATCGCCAGCAACATTGGCGGCAAGCAAGCGCTCGAAACGGTGCAGCGGCT  
GTTGCCGGTGTGTGCCAGGACCATGGCCTGACCCCGGACCAAGTGGTGGCTAT  
CGCCAGCAACGGTGGCGGCAAGCAAGCGCTCGAAACGGTGCAGCGGCTGTTGCC  
GGTGTGTGCCAGGACCATGGCCTGACTCCGGACCAAGTGGTGGCTATCGCCAG  
CCACGATGGCGGCAAGCAAGCGCTCGAAACGGTGCAGCGGCTGTTGCCGGTGT  
GTGCCAGGACCATGGCCTGACCCCGGACCAAGTGGTGGCTATCGCCAGCAACGG  
TGCGGCAAGCAAGCGCTCGAAAGCATTGTGGCCAGCTGAGCCGGCCTGATCC  
GGCGTTGGCCGCGTTGAC  
CAACGACCACCTCGTCGCCTTGGCCTGCCTCGGCGGACGTCCTGCCATGGATGCA  
GTGAAAAAGGGATTGCCGCACGCGCCGGAATTGATCAGAAGAGTCAATCGCCGTA  
TTGGCGAACGCACGTCCATCGCGTTGCCGGATCCCAACTAGTCAAAGTGA  
GGAGGAGAAGAAATCTGAACTTCGTCATAAATTGAAATATGTGCCTCATGAATAT  
TGAATTAATTGAAATTGCCAGAAATCCACTCAGGATAGAATTCTTGAATGAAGGT  
AATGGAATTTTTATGAAAGTTTATGGATATAGAGGTAACATTTGGGTGGATCAAG  
GAAACCGGACGGAGCAATTTATACTGTCGGATCTCCTATTGATTACGGTGTGATCG  
TGATACTAAAGCTTATAGCGGAGGTTATAATCTGCCAATTGGCCAAGCACGTGAA

ATGCAACGATATGTCTGAAGAAAATCAAACACGAAACAAACATATCAACCCTAATGAA  
TGGTGGAAAGTCTATCCATCTTCTGTAACGGAATTTAAGTTTTTATTTGTGAGTGGT  
CACTTTAAAGGAAACTACAAAGCTCAGCTTACACGATTAATAGAATCACTAATTGT  
AATGGAGCTGTTCTTAGTGTAGAAGAGCTTTTAATTGGTGGAGAAATGATTAAGC  
CGGCACATTAACCTTAGAGGAAGTGCGCCGGAATTTAATAACGGCGAGATAAACT  
TTTAATCTAGAACTATAGTGAGTCGTATTACGTAGATCCAGACATGATAAGATACAT  
TGATGAGTTTGGACAAACCACAACACTAGAATGCAGTGAAAAAATGCTTTATTTGTGA  
AATTTGTGATGCTATTGCTTTATTTGTAACCATTATAAGCTGCAATAAACAAGTTAAC  
AACAACAATTGCATTCATTTTATGTTTCAGGTTCCAGGGGAGGTGTGGGAGGTTTT  
TTAATTCGCGGCCGCGGCCCAATGCATTGGGCCCGGTACGTACCAGCTTTTGT  
TCCCTTLAGTGAGGGTTAATTGCGCGCTTGGCGTAATCATGGTCATAGCTGTTTCC  
TGTGTGAAATTGTTATCCGCTCACAATTCCACACAACATACGAGCCGGAAGCATAA  
AGTGTAAAGCCTGGGGTGCCTAATGAGTGAGCTAACTCACATTAATTGCGTTGCGC  
TCACTGCCCGCTTCCAGTCGGGAAACCTGTCTGTCAGCTGCATTAATGAATCG  
GCCAACGCGCGGGGAGAGGCGGTTTGCCTATTGGGCGCTCTTCCGCTTCCCTCGC  
TCACTGACTCGCTGCGCTCGGTCTGTTCCGCTGCGGCGAGCGGTATCAGCTCACTC  
AAAGGCGGTAATACGGTTATCCACAGAATCAGGGGATAACGCAGGAAAGAACATG  
TGAGCAAAGGCCAGCAAAGGCCAGGAACCGTAAAAAGGCCGCGTTGCTGGCG  
TTTTTCCATAGGCTCCGCCCCCTGACGAGCATCACAAAATCGACGCTCAAGTCA  
GAGGTGGCGAAACCCGACAGGACTATAAAGATACCAGGCGTTTCCCCCTGGAAGC  
TCCCTCGTGCGCTCTCCTGTTCCGACCCTGCCGCTTACCGGATACCTGTCCGCCT  
TTCTCCCTTCGGGAAGCGTGGCGCTTCTCATAGCTCACGCTGTAGGTATCTCAGT  
TCGGTGTAGGTCGTTGCTCCAAGCTGGGCTGTGTGCACGAACCCCCCGTTCAGC  
CCGACCGCTGCGCCTTATCCGGTAACTATCGTCTTGAGTCCAACCCGGTAAGACA  
CGACTTATCGCCACTGGCAGCAGCCACTGGTAACAGGATTAGCAGAGCGAGGTAT  
GTAGGCGGTGCTACAGAGTTCTTGAAGTGGTGGCCTAACTACGGCTACACTAGAA  
GGACAGTATTTGGTATCTGCGCTCTGCTGAAGCCAGTTACCTTCGGAAAAAGAGTT  
GGTAGCTCTTGATCCGGCAAACAAACCACCGCTGGTAGCGGTGGTTTTTTTGTGTTG  
CAAGCAGCAGATTACGCGCAGAAAAAAGGATCTCAAGAAGATCCTTTGATCTTTT  
CTACGGGGTCTGACGCTCAGTGGAACGAAAACCTCACGTTAAGGGATTTTGGTCAT  
GAGATTATCAAAAAGGATCTTACCTAGATCCTTTTAAATTAATAAATGAAGTTTTAAA  
TCAATCTAAAGTATATATGAGTAACTTGGTCTGACAGTTACCAATGCTTAATCAGT  
GAGGCACCTATCTCAGCGATCTGTCTATTTTCGTTTCATCCATAGTTGCCTGACTCCC  
CGTCGTGTAGATAACTACGATACGGGAGGGCTTACCATCTGGCCCCAGTGCTGCA  
ATGATACCGCGAGACCCACGCTCACCGGCTCCAGATTTATCAGCAATAAACCAGC  
CAGCCGGAAGGGCCGAGCGCAGAAGTGGTCCTGCAACTTTATCCGCCTCCATCCA  
GTCTATTAATTGTTGCCGGGAAGCTAGAGTAAGTAGTTCGCCAGTTAATAGTTTGC  
GCAACGTTGTTGCCATTGCTACAGGCATCGTGGTGTACGCTCGTCGTTTGGTATG  
GCTTCATTGAGCTCCGGTTCCCAACGATCAAGGCGAGTTACATGATCCCCCATGTT  
GTGCAAAAAGCGGTTAGCTCCTTCGGTCCCTCCGATCGTTGTCAGAAGTAAGTTGG  
CCGCAGTGTTATCACTCATGGTTATGGCAGCACTGCATAATTCTCTTACTGTCATGC  
CATCCGTAAGATGCTTTTCTGTGACTGGTGAGTACTCAACCAAGTCATTCTGAGAAT  
AGTGTATGCGGCGACCGAGTTGCTCTTGCCCGGCGTCAATACGGGATAATACCGC  
GCCACATAGCAGAACTTTAAAAGTGCTCATCATTGAAAACGTTCTTCGGGGCGAA  
AACTCTCAAGGATCTTACCGCTGTTGAGATCCAGTTCGATGTAACCCACTCGTGCA  
CCCAACTGATCTTCAGCATCTTTTACTTTACCAGCGTTTCTGGGTGAGCAAAAACA

GGAAGGCAAATGCCGCAAAAAAGGGAATAAGGGCGACACGGAAATGTTGAATAC  
TCATACTCTTCCTTTTTCAATATTATTGAAGCATTATCAGGGTTATTGTCTCATGAG  
CGGATACATATTTGAATGTATTTAGAAAAATAAACAAATAGGGGTTCCGCGCACATT  
TCCCCGAAAAGTGCCACCTAAATTGTAAGCGTTAATATTTTGTAAAATTCGCGTTA  
AATTTTTGTAAATCAGCTCATTTTTTAACCAATAGGCCGAAATCGGCAAAATCCCT  
TATAAATCAAAGAATAGACCGAGATAGGGTTGAGTGTTGTTCCAGTTTGGAAACAA  
GAGTCCACTATTAAGAACGTGGACTCCAACGTCAAAGGGCGAAAAACCGTCTATC  
AGGGCGATGGCCCACTACGTGAACCATCACCTAATCAAGTTTTTTGGGGTTCGAG  
GTGCCGTAAAGCACTAAATCGGAACCCTAAAGGGAGCCCCCGATTTAGAGCTTGA  
CGGGGAAAGCCGGCGAACGTGGCGAGAAAGGAAGGGAAGAAAGCGAAAGGAGC  
GGGCGCTAGGGCGCTGGCAAGTGTAGCGGTACGCTGCGCGTAACCACCACACC  
CGCCGCGCTTAATGCGCCGCTACAGGGCGCGTCCCATTGCGCATTGAGGCTGCG  
CAACTGTTGGGAAGGGCGATCGGTGCGGGCCTCTTCGCTATTACGCCAGTTCGACC  
ATAGCCAATTC AATATGGCGTATATGGACTCATGCCAATTC AATATGGTGGATCTG  
GACCTGTGCCAATTC AATATGGCGTATATGGACTCGTGCCAATTC AATATGGTGG  
TCTGGACCCCAGCCAATTC AATATGGCGGACTTGGCACCATGCCAATTC AATATGG  
CGGACTTGGCACTGTGCCAACTGGGGAGGGGTCTACTTGGCACGGTGCCAAGTTT  
GAGGAGGGGTCTTGGCCCTGTGCCAAGTCCGCCATATTGAATTGGCATGGTGCCA  
ATAATGGCGGCCATATTGGCTATATGCCAGGATCAATATATAGGCAATATCCAATAT  
GGCCCTATGCCAATATGGCTATTGGCCAGGTTCAATACTATGTATTGGCCCTATGC  
CATATAGTATTCCATATATGGGTTTTCTATTGACGTAGATAGCCCCTCCCAATGGG  
CGGTCCCATATACCATATATGGGGCTTCTAATACCGCCCATAGCCACTCCCCCAT  
TGACGTCAATGGTCTCTATATATGGTCTTTCTATTGACGTCAATATGGGCGGTCCTA  
TTGACGTATATGGCGCCTCCCCATTGACGTCAATTACGGTAAATGGCCCCGCCTG  
GCTCAATGCCAATTGACGTCAATAGGACCACCCACCATTGACGTCAATGGGATGG  
CTCATTGCCAATTCATATCCGTTCTCACGCCCCCTATTGACGTCAATGACGGTAAAT  
GGCCCACTTGGCAGTACATCAATATCTATTAATAGTAACTTGGCAAGTACACTACTA  
TTGGAAGGACGCCAGGGTACATTGGCAGTACTCCCATTGACGTCAATGGGCGGTAA  
ATGGCCCCGCGATGGCTGCCAAGTACATCCCATTGACGTCAATGGGGAGGGGCA  
ATGACGCAAATGGGCGTTCCATTGACGTAAATGGGCGGTAGGCGTGCCTAATGGG  
AGGTCTATATAAGCAATGCTCGTTTAGGGAAC

## References

1. Pattatucci, A.M. & Kaufman, T.C. The homeotic gene Sex combs reduced of *Drosophila melanogaster* is differentially regulated in the embryonic and imaginal stages of development. *Genetics* **129**, 443-61 (1991).
2. Feng, S., Lu, S., Grueber, W.B. & Mann, R.S. Scarless engineering of the *Drosophila* genome near any site-specific integration site. *Genetics* **217**(2021).
3. Slattery, M. *et al.* Cofactor binding evokes latent differences in DNA binding specificity between Hox proteins. *Cell* **147**, 1270-82 (2011).
4. Tsubota, T., Saigo, K. & Kojima, T. Hox genes regulate the same character by different strategies in each segment. *Mechanisms of Development* **125**, 894-905 (2008).
5. Dobzhansky, T. DROSOPHILA MIRANDA, A NEW SPECIES. *Genetics* **20**, 377 (1935).
6. Kopp, A. *Drosophila* sex combs as a model of evolutionary innovations. *Evol Dev* **13**, 504-22 (2011).
