# Supplementary material for: Transcription factor paralogs orchestrate alternative gene regulatory networks by context-dependent cooperation with multiple cofactors
Source: PubMed Central journal article supplement (PMC9249852; doi:10.1038/s41467-022-31501-2), 2022-07-01
Supplement: 41467_2022_31501_MOESM3_ESM.pdf [file 41467_2022_31501_MOESM3_ESM.pdf]

### **Descriptions of additional supplementary information files**

1. Supplementary Data 1 – transcriptome details
2. Supplementary Data 2 – CHIP-seq details
3. Supplementary Data 3 -- primers
4. Supplementary Data 4 – reporter gene coordinates
