# Supplementary material for: Transcription factor paralogs orchestrate alternative gene regulatory networks by context-dependent cooperation with multiple cofactors
Source: PubMed Central journal article supplement (PMC9249852; doi:10.1038/s41467-022-31501-2), 2022-07-01
Supplement: 41467_2022_31501_MOESM8_ESM.pdf [file 41467_2022_31501_MOESM8_ESM.pdf]

## Reporting Summary

Nature Portfolio wishes to improve the reproducibility of the work that we publish. This form provides structure for consistency and transparency in reporting. For further information on Nature Portfolio policies, see our [Editorial Policies](#) and the [Editorial Policy Checklist](#).

### Statistics

For all statistical analyses, confirm that the following items are present in the figure legend, table legend, main text, or Methods section.

n/a Confirmed

- The exact sample size ( $n$ ) for each experimental group/condition, given as a discrete number and unit of measurement
- A statement on whether measurements were taken from distinct samples or whether the same sample was measured repeatedly
- The statistical test(s) used AND whether they are one- or two-sided  
*Only common tests should be described solely by name; describe more complex techniques in the Methods section.*
- A description of all covariates tested
- A description of any assumptions or corrections, such as tests of normality and adjustment for multiple comparisons
- A full description of the statistical parameters including central tendency (e.g. means) or other basic estimates (e.g. regression coefficient) AND variation (e.g. standard deviation) or associated estimates of uncertainty (e.g. confidence intervals)
- For null hypothesis testing, the test statistic (e.g.  $F$ ,  $t$ ,  $r$ ) with confidence intervals, effect sizes, degrees of freedom and  $P$  value noted  
*Give  $P$  values as exact values whenever suitable.*
- For Bayesian analysis, information on the choice of priors and Markov chain Monte Carlo settings
- For hierarchical and complex designs, identification of the appropriate level for tests and full reporting of outcomes
- Estimates of effect sizes (e.g. Cohen's  $d$ , Pearson's  $r$ ), indicating how they were calculated

*Our web collection on [statistics for biologists](#) contains articles on many of the points above.*

### Software and code

Policy information about [availability of computer code](#)

Data collection

Data analysis

For manuscripts utilizing custom algorithms or software that are central to the research but not yet described in published literature, software must be made available to editors and reviewers. We strongly encourage code deposition in a community repository (e.g. GitHub). See the Nature Portfolio [guidelines for submitting code & software](#) for further information.

### Data

Policy information about [availability of data](#)

All manuscripts must include a [data availability statement](#). This statement should provide the following information, where applicable:

- Accession codes, unique identifiers, or web links for publicly available datasets
- A description of any restrictions on data availability
- For clinical datasets or third party data, please ensure that the statement adheres to our [policy](#)

## Field-specific reporting

Please select the one below that is the best fit for your research. If you are not sure, read the appropriate sections before making your selection.

Life sciences       Behavioural & social sciences       Ecological, evolutionary & environmental sciences

For a reference copy of the document with all sections, see [nature.com/documents/nr-reporting-summary-flat.pdf](https://www.nature.com/documents/nr-reporting-summary-flat.pdf)

## Life sciences study design

All studies must disclose on these points even when the disclosure is negative.

|                 |                                                                                                                                                                   |
|-----------------|-------------------------------------------------------------------------------------------------------------------------------------------------------------------|
| Sample size     | The sample sizes (for example in Fig 3d) were determined empirically when applicable.                                                                             |
| Data exclusions | No data were excluded                                                                                                                                             |
| Replication     | ChIP-seq and ATAC-seq experiments had at least 2 biological replicates, and RNA-seq experiments had at least 3. All biological replicates agreed with one another |
| Randomization   | No experiment in this study required randomization.                                                                                                               |
| Blinding        | Researchers who analyzed the results were not blinded.                                                                                                            |

## Reporting for specific materials, systems and methods

We require information from authors about some types of materials, experimental systems and methods used in many studies. Here, indicate whether each material, system or method listed is relevant to your study. If you are not sure if a list item applies to your research, read the appropriate section before selecting a response.

### Materials & experimental systems

### Methods

|                                     |                                                                 |
|-------------------------------------|-----------------------------------------------------------------|
| n/a                                 | Included in the study                                           |
| <input type="checkbox"/>            | <input checked="" type="checkbox"/> Antibodies                  |
| <input checked="" type="checkbox"/> | <input type="checkbox"/> Eukaryotic cell lines                  |
| <input checked="" type="checkbox"/> | <input type="checkbox"/> Palaeontology and archaeology          |
| <input type="checkbox"/>            | <input checked="" type="checkbox"/> Animals and other organisms |
| <input checked="" type="checkbox"/> | <input type="checkbox"/> Human research participants            |
| <input checked="" type="checkbox"/> | <input type="checkbox"/> Clinical data                          |
| <input checked="" type="checkbox"/> | <input type="checkbox"/> Dual use research of concern           |

|                                     |                                                 |
|-------------------------------------|-------------------------------------------------|
| n/a                                 | Included in the study                           |
| <input type="checkbox"/>            | <input checked="" type="checkbox"/> ChIP-seq    |
| <input checked="" type="checkbox"/> | <input type="checkbox"/> Flow cytometry         |
| <input checked="" type="checkbox"/> | <input type="checkbox"/> MRI-based neuroimaging |

## Antibodies

|                 |                                                                                                                                                                                                                                                                                                                                                                                                                                                                                                                                                                                       |
|-----------------|---------------------------------------------------------------------------------------------------------------------------------------------------------------------------------------------------------------------------------------------------------------------------------------------------------------------------------------------------------------------------------------------------------------------------------------------------------------------------------------------------------------------------------------------------------------------------------------|
| Antibodies used | mouse anti-FLAG M2 antibody (Sigma F1804), Guinea pig anti-Dll antibody (Mann lab), guinea pig anti-Scr (Mann lab), monoclonal mouse anti-Ubx (FP3.38, ascites), polyclonal rabbit anti-β-Gal (MP Biomedicals, cat #559762, lot #06825), polyclonal guinea pig anti-Hth (Mann lab), polyclonal goat-anti Dll (Santa Cruz sc-15858), polyclonal rabbit anti-CrebA (Andrew et al., 1997), chicken anti-GFP (abcam ab13970), mouse anti-T7 antibody (Millipore Sigma 69522), HRP conjugated anti-T7 antibody (Millipore Sigma 69048)                                                     |
| Validation      | All antibodies used were either commercially available or previously published. Validation of commercial antibodies can be found at manufacturer's websites. Validation of mouse anti-Ubx is available at DSHB. Guinea pig anti-Dll antibody (ref: PMID: 18194655), guinea pig anti-Scr (ref: PMID: 20634319), and guinea pig anti-Hth (ref: PMID: 10398683) were validated in previous studies. Validation of the No new antibody was generated in this study. For all antibodies used in staining experiments, the results fit the expected patterns of the corresponding antigens. |

## Animals and other organisms

Policy information about [studies involving animals](#); [ARRIVE guidelines](#) recommended for reporting animal research

|                         |                                                                                                                                                                                                          |
|-------------------------|----------------------------------------------------------------------------------------------------------------------------------------------------------------------------------------------------------|
| Laboratory animals      | Drosophila melanogaster. Various strains were used as specified in the manuscript. Animals of mixed sexes were used unless specified. Age (developmental stage) of animals were specified in manuscript. |
| Wild animals            | No wild animals were used in this study                                                                                                                                                                  |
| Field-collected samples | No field collected samples were used in this study                                                                                                                                                       |
| Ethics oversight        | This study did not require ethical approval                                                                                                                                                              |

## ChIP-seq

### Data deposition

Confirm that both raw and final processed data have been deposited in a public database such as [GEO](#).

Confirm that you have deposited or provided access to graph files (e.g. BED files) for the called peaks.

Data access links

*May remain private before publication.*

<https://www.ncbi.nlm.nih.gov/geo/query/acc.cgi?acc=GSE184454> token: eboxasuwlplvlvqx

Files in database submission

raw fastq files and bigwig files

Genome browser session

(e.g. [UCSC](#))

N/A

### Methodology

Replicates

2 biological replicates were performed for each experiment

Sequencing depth

at least 20 million reads per sample

Antibodies

mouse anti-FLAG M2 antibody (Sigma F1804) and Guinea pig anti-DII antibody (Mann lab)

Peak calling parameters

MACS2 was used, with the following parameters: --nomodel --extsize 200

Data quality

Depending on experiments, from ~4000 to ~8000 peaks were called with 5% FDR cutoff. Fold enrichment varies depending on the factor being investigated.

Software

All analyses were performed using usegalaxy.org. Bowtie and MACS2 were used.
